# Supplementary material
Source: Research Square preprint supplement (doi:10.21203/rs.3.rs-9689398/v1)
Supplement: Supplementary file 1 [file 3315d868f83aece6a29873c8.pdf]

## Enhancing Electrode/Electrolyte Interface Stability in High-Voltage Sodium-Ion Batteries via an Anhydride Additive

Xiaohui Han<sup>1,2</sup>, Siqi Tang<sup>1,2</sup>, Hui Duan<sup>1</sup>, Xinhai Li<sup>1</sup>, Zhixing Wang<sup>1</sup>, Huajun Guo<sup>1</sup>, Jiexi Wang<sup>1,\*</sup>

<sup>1</sup>School of Metallurgy and Environment, Central South University, Changsha, Hunan 410083, China

<sup>2</sup>R&D Department, Huizhou Highpower Technology Co., Ltd., Huizhou 516057, China

\*Corresponding authors: wangjiexikeen@csu.edu.cn (Jiexi Wang)

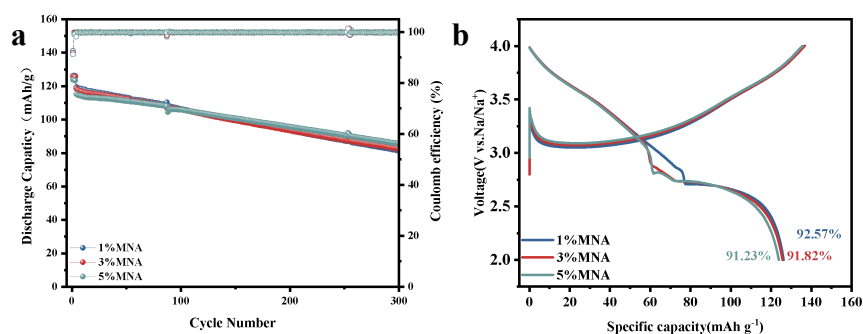

**Figure S1.** The cycling performance of Na//NFM batteries using different amount (1%/3%/5%) of MNA at 25 °C : (a) cycling performance, (b) the initial charge-discharge curves.

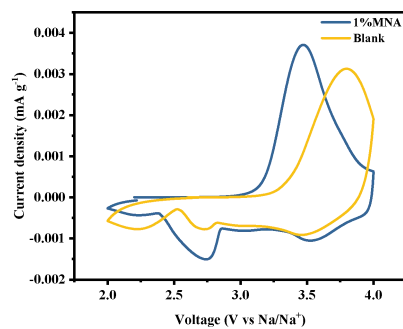

**Figure S2.** CV curves of Na//NFM batteries using electrolytes with and without MNA..

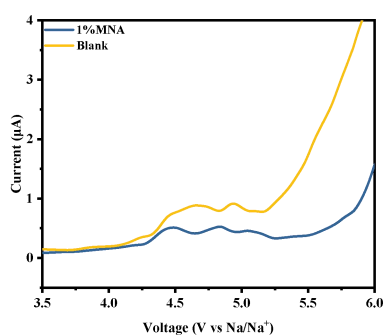

**Figure S3.** LSV curves of sodium metal batteries using electrolytes with and without MNA.
